# Supplementary material for: Anti-Oxidative and Anti-Inflammatory Activities of Astragalus membranaceus Fermented by Lactiplantibacillus plantarum on LPS-Induced RAW 264.7 Cells
Source: MDPI journal article supplement (doi:10.3390/fermentation7040252), 2021-11-01
Supplement: s1 [file s1]

**Table S1.** Selected ion monitoring (SIM) conditions for standards.

| Standards | Formula  | Ion Mode | Q1     | DP | CEP |
|-----------|----------|----------|--------|----|-----|
| Calycosin | C16H12O5 | positive | 307.07 | 61 | 20  |

Q1, precursor m/z; DP, declustering potential (volts); CEP, collision entrance potential.

**Table S2.** DPPH radical scavenging activities of the AM-NF and AM-LP.

| Sample <sup>1)</sup>        |        | Radical scavenging activity (%) |
|-----------------------------|--------|---------------------------------|
| Media                       |        | 50.54 ± 1.58                    |
| AM-NF                       |        | 51.22 ± 1.49                    |
| L-ascorbic acid (100 µg/mL) |        | 85.67 ± 1.15*                   |
| AM-LP                       | MG5141 | 64.83 ± 1.14*                   |
|                             | MG5142 | 61.02 ± 0.77*                   |
|                             | MG5143 | 53.80 ± 0.84                    |
|                             | MG5144 | 48.66 ± 0.74                    |
|                             | MG5145 | 72.05 ± 0.60*                   |
|                             | MG5182 | 61.36 ± 0.29                    |
|                             | MG5185 | 65.50 ± 0.42*                   |
|                             | MG5186 | 54.16 ± 1.28                    |
|                             | MG5187 | 60.20 ± 0.15                    |
|                             | MG5188 | 60.54 ± 1.09                    |
|                             | MG5194 | 59.94 ± 0.68*                   |
|                             | MG5198 | 63.60 ± 0.12                    |
|                             | MG5201 | 56.04 ± 0.66                    |
|                             | MG5202 | 59.62 ± 0.25                    |
|                             | MG5203 | 60.11 ± 0.21                    |
|                             | MG5204 | 59.12 ± 0.00                    |
|                             | MG5211 | 62.02 ± 0.04                    |
|                             | MG5243 | 62.69 ± 0.02                    |
|                             | MG5247 | 54.72 ± 0.70                    |
|                             | MG5248 | 56.29 ± 1.01*                   |
|                             | MG5249 | 61.51 ± 1.23*                   |
|                             | MG5251 | 63.67 ± 0.70*                   |
|                             | MG5254 | 53.23 ± 0.50                    |
|                             | MG5255 | 56.05 ± 0.43                    |
|                             | MG5260 | 56.72 ± 0.29                    |
|                             | MG5270 | 61.94 ± 0.07                    |
|                             | MG5276 | 70.38 ± 1.12**                  |
|                             | MG5281 | 62.10 ± 0.39*                   |
|                             | MG5283 | 65.50 ± 0.19*                   |
|                             | MG5287 | 60.87 ± 0.40                    |
|                             | MG5289 | 62.60 ± 0.14                    |
|                             | MG5302 | 64.34 ± 0.45*                   |
|                             | MG5307 | 66.74 ± 0.98*                   |
|                             | MG5308 | 64.10 ± 0.36                    |
|                             | MG5309 | 60.94 ± 0.42                    |
|                             | MG5324 | 66.66 ± 0.39*                   |
|                             | MG5330 | 61.45 ± 0.30                    |

<sup>1)</sup> Media, media without *A. membranaceus* extract; AM-NF, *A. membranaceus* extract not fermented by *L. plantarum*; AM-LP, *A. membranaceus* extract fermented by *L. plantarum*.

L-ascorbic acid at 100 µg/mL was used as a positive control. Values are expressed as mean ± SD. \*p < 0.05, \*\*p < 0.01, \*\*\*p < 0.001 comparing AM-NF.

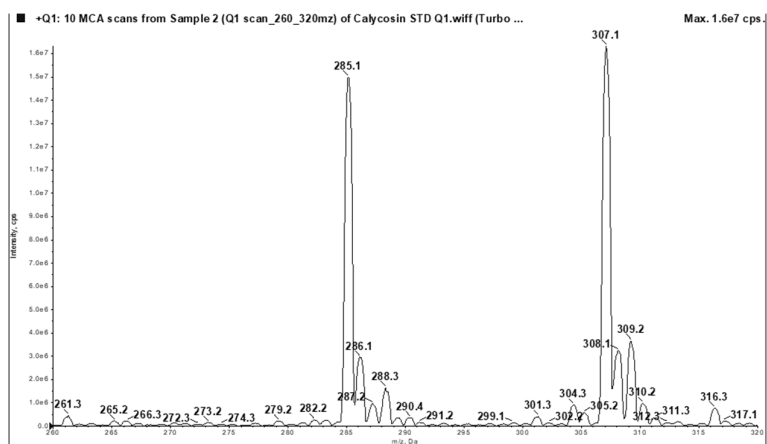

**Figure S1.** ESI-MS/MS spectrum of calycosin.
